# Supplementary material for: Intrinsic defect structures of polycrystalline CaKFe4As4 superconductors
Source: Royal Society of Chemistry journal article supplement (doi:10.1039/d1cp02613e), 2021-01-01
Supplement: d1cp02613e1.pdf [file d1cp02613e1.pdf]

## Intrinsic defect structures of polycrystalline $\text{CaFe}_4\text{As}_4$ superconductor

Sugali Pavan Kumar Naik <sup>\*,a,b</sup>, Shigeyuki Ishida <sup>b</sup>, Koji Kimoto <sup>c</sup>, Keiichi Yanagisawa <sup>c</sup>, Yoshihisa Kamiya <sup>b,d</sup>, Yoshinori Tsuchiya <sup>b</sup>, Kenji Kawashima <sup>b,d</sup>, Yoshiyuki Yoshida <sup>b</sup>, Akira Iyo <sup>b</sup>, Hiroshi Eisaki <sup>b</sup>, Taichiro Nishio <sup>a</sup> and Hiraku Ogino <sup>#,b</sup>

<sup>a</sup>Department of Physics, Tokyo University of Science, 1 Chome-3 Kagurazaka, Shinjuku City, Tokyo 162-8601, Japan

<sup>b</sup>Research Institute for Advanced Electronics and Photonics, National Institute of Advanced Industrial Science and Technology (AIST), 1-1-1 Central 2, Umezono, Tsukuba, Ibaraki, 305-8568

<sup>c</sup>National Institute for Materials Science, Tsukuba, Ibaraki 305-0047, Japan

<sup>d</sup>IMRA Materials R&D Co., Ltd., Kariya, Aichi 448-0032, Japan

Email: \*spavankumarnaik@yahoo.in, drspkn@rs.tus.ac.jp and #h-ogino@aist.go.jp

### Supplementary data

Figure S1(a) shows the ADF image, and its Fourier transform is shown in (b). Since the strains are very localized, it is observed as the streak around the spots.

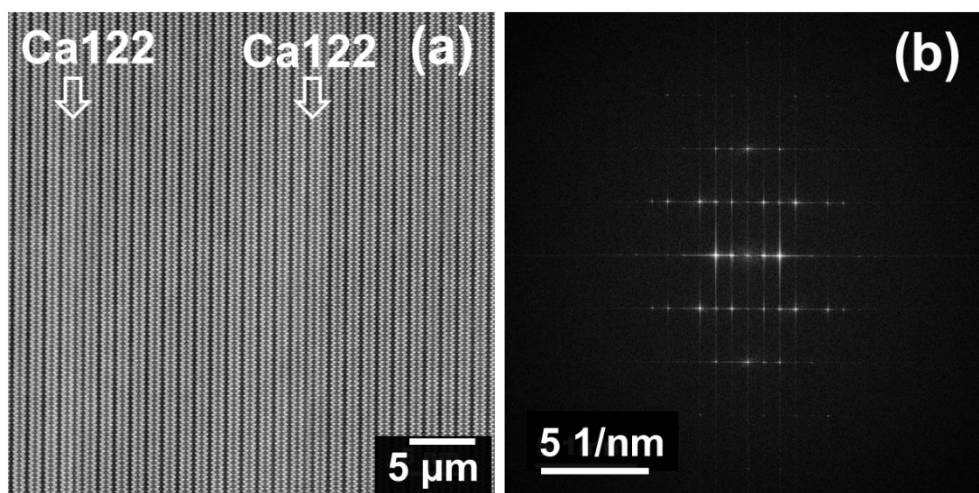

Fig. S1. (a) ADF image (Fig. 4(a)) and its Fourier transform (b).

The distribution of each element in the  $\text{CaK1144}$  polycrystalline sample was investigated using the resolution improved STEM image (selected area in Fig. 3(d)) by the maximum entropy method and rotated by  $90^\circ$ . The ADF image is shown along with the element intensity profiles of Ca and K in Fig. S2. The intensities of the K and Ca profiles are observed to migrate in a stepwise manner, indicating Ca122 defect exchange.

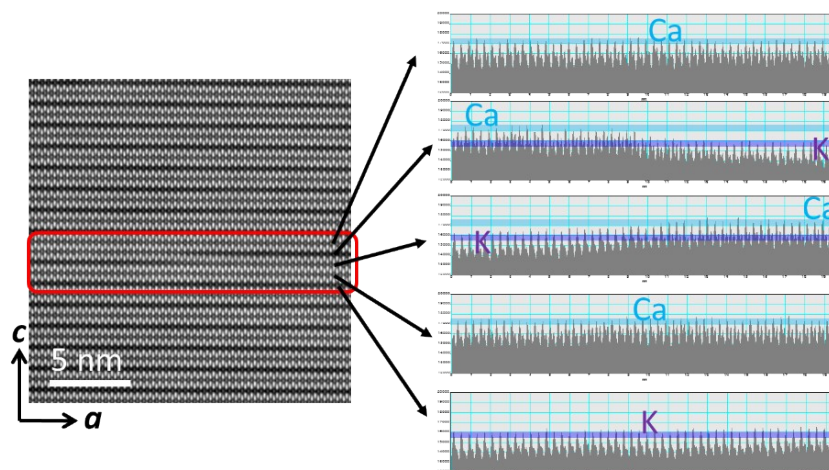

Fig. S2. STEM-ADF image and the strength profile for the elements Ca and K. The change of the Ca/K sites in defects can be indicated by stepwise change of quantified brightness of the image.

The strain fields resulted by different defect structures in polycrystalline CaK1144 sample are shown in Fig. S3.

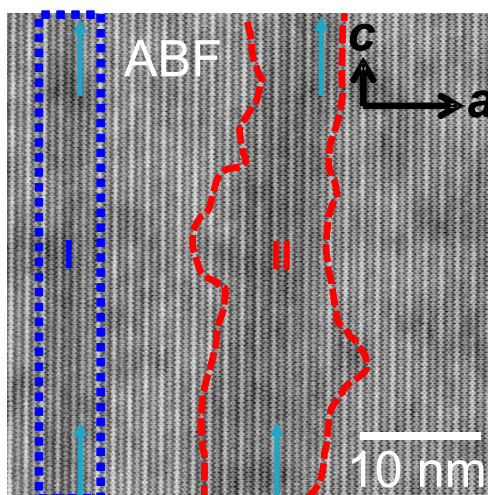

Fig. S3. ABF image of the CaK1144 polycrystalline sample with the indication of contrast area as well as Ca122 defect layers.
